# Supplementary material for: Hydrothermal synthesis, characterization, and color-tunable luminescence properties of Bi2MoO6:Eu3+ phosphors
Source: Royal Society of Chemistry journal article supplement (doi:10.1039/c5ra03913d), 2015-01-01
Supplement: c5ra03913d1.pdf [file c5ra03913d1.pdf]

**Hydrothermal Synthesis, Characterization, and Color-Tunable  
Luminescence Properties of Bi<sub>2</sub>MoO<sub>6</sub>:Eu<sup>3+</sup> Phosphors**

Junjun Zhang, Yali Liu, Linlin Li, Nannan Zhang, Lianchun Zou\*,  
Shucaï Gan\*

College of Chemistry, Jilin University, Changchun 130026, PR China

\* Corresponding author: E-mail: [zoulianchun@126.com](mailto:zoulianchun@126.com) (L.C. Zou)

\* Corresponding author: E-mail: [gansc@jlu.edu.cn](mailto:gansc@jlu.edu.cn) (S.C. Gan)

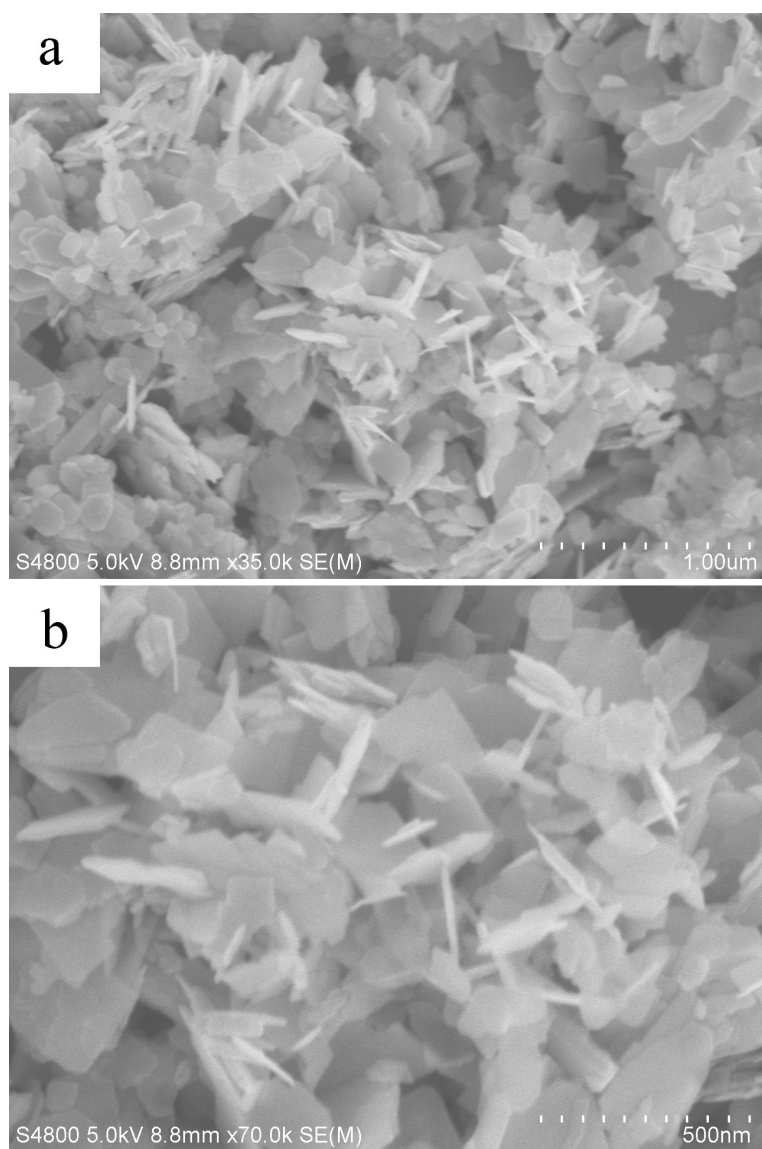

**Fig.S1. SEM images of the as-prepared  $\text{Bi}_2\text{MoO}_6:15\%\text{Eu}^{3+}$  sample (hydrothermally treated at 180°C for 12 h, uncalcined).**

The morphologies show rather thin (20–30 nm) agglomerated nanosheet with irregular shape.

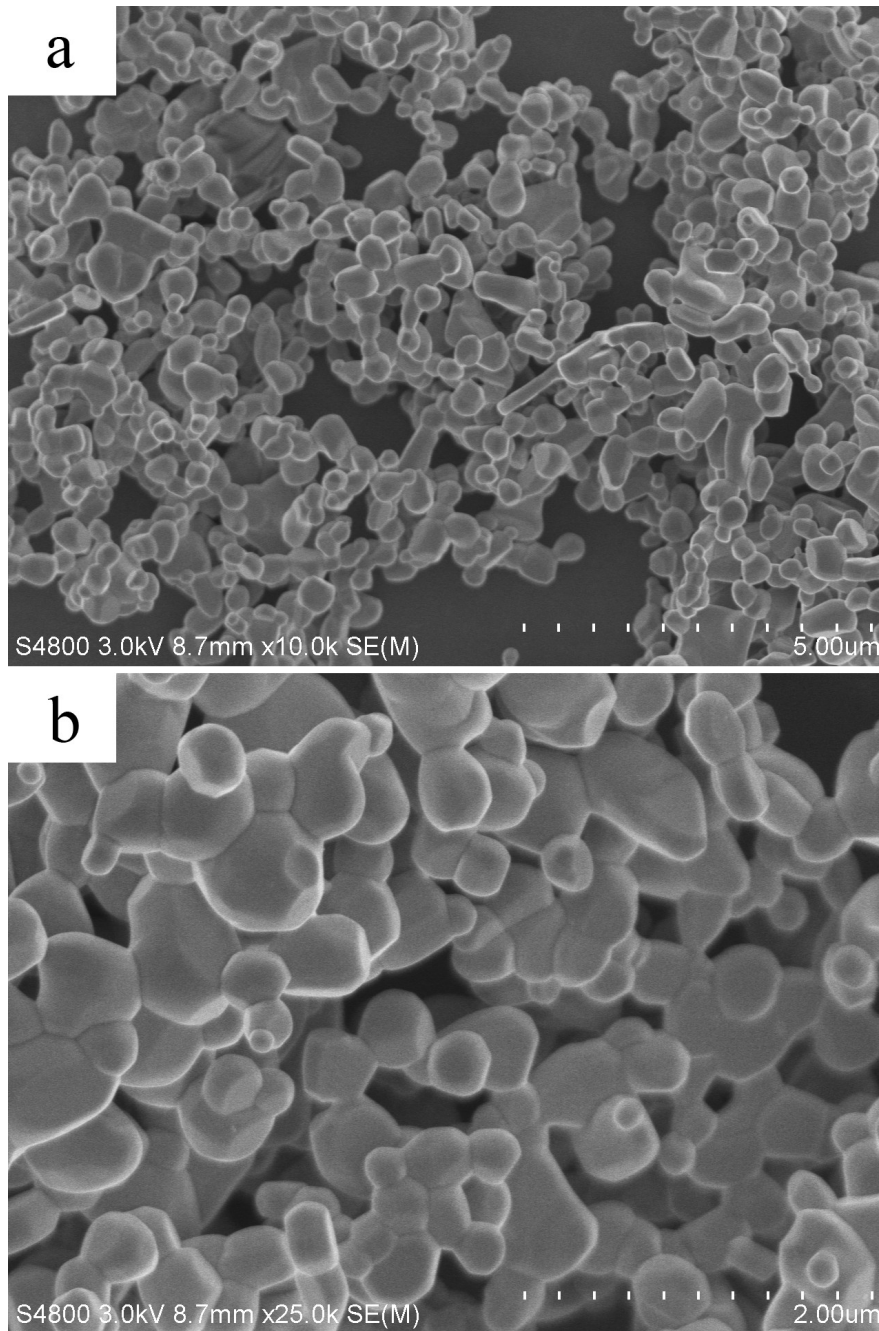

**Fig.S2. SEM images of the as-prepared  $\text{Bi}_2\text{MoO}_6:15\%\text{Eu}^{3+}$  sample (annealed at 500°C for 2h).**

The sample is composed of irregular block with a diameter of 300-800 nm.
